RESEARCH ARTICLE

# Gait Biomechanics and Patient-Reported Function as Predictors of Response to a Hip Strengthening Exercise Intervention in Patients with Knee Osteoarthritis

Dylan Kobsar<sup>1\*</sup>, Sean T. Osis<sup>1,3</sup>, Blayne A. Hettinga<sup>1,3</sup>, Reed Ferber<sup>1,2,3</sup>

**1** Faculty of Kinesiology, University of Calgary, Calgary, Alberta, Canada, **2** Faculty of Nursing, University of Calgary, Calgary, Alberta, Canada, **3** Running Injury Clinic, Calgary, Alberta, Canada

\* [dylan.kobsar@ucalgary.ca](mailto:dylan.kobsar@ucalgary.ca)

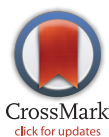

OPEN ACCESS

**Citation:** Kobsar D, Osis ST, Hettinga BA, Ferber R (2015) Gait Biomechanics and Patient-Reported Function as Predictors of Response to a Hip Strengthening Exercise Intervention in Patients with Knee Osteoarthritis. PLoS ONE 10(10): e0139923. doi:10.1371/journal.pone.0139923

**Editor:** François Hug, Université de Nantes, FRANCE

**Received:** April 27, 2015

**Accepted:** September 19, 2015

**Published:** October 7, 2015

**Copyright:** © 2015 Kobsar et al. This is an open access article distributed under the terms of the [Creative Commons Attribution License](https://creativecommons.org/licenses/by/4.0/), which permits unrestricted use, distribution, and reproduction in any medium, provided the original author and source are credited.

**Data Availability Statement:** All gait principal component and survey data are included with the submission, but due to ethical restrictions, any additional data (e.g., full set of patient gait kinematics) will be available upon request from the Running Injury Clinic and University of Calgary Institutional Data Access / Ethics Committee (CHREB) by contacting Dr. Stacey A. Page, chair of CHREB at [omb@ucalgary.ca](mailto:omb@ucalgary.ca).

**Funding:** This research was supported by a funding from Alberta Innovates: Health Solutions (Grant Number: 20140433 - <http://www.aihealthsolutions.ca/>)

## Abstract

### Objective

Muscle strengthening exercises have been shown to improve pain and function in adults with mild-to-moderate knee osteoarthritis, but individual response rates can vary greatly. Predicting individuals who respond and those who do not is important in developing a more efficient and effective model of care for knee osteoarthritis (OA). Therefore, the purpose of this study was to use pre-intervention gait kinematics and patient-reported outcome measures to predict post-intervention response to a 6-week hip strengthening exercise intervention in patients with mild-to-moderate knee OA.

### Methods

Thirty-nine patients with mild-to-moderate knee osteoarthritis completed a 6-week hip-strengthening program and were subgrouped as Non-Responders, Low-Responders, or High-Responders following the intervention based on their change in Knee injury Osteoarthritis Outcome Score (KOOS). Predictors of responder subgroups were retrospectively determined from baseline patient-reported outcome measures and kinematic gait parameters in a discriminant analysis of principal components. A 3–4 year follow-up on 16 of the patients with knee OA was also done to examine long-term changes in these parameters.

### Results

A unique combination of patient-reported outcome measures and kinematic factors was able to successfully subgroup patients with knee osteoarthritis with a cross-validated classification accuracy of 85.4%. Lower patient-reported function in daily living (ADL) scores and hip frontal plane kinematics during the loading response were most important in classifying High-Responders from other sub-groups, while a combination of hip, knee, ankle kinematics were used to classify Non-Responders from Low-Responders.

and the Canadian Institutes of Health Research (Grant Number: GSD-128743 - <http://www.cihr-irsc.gc.ca/e/193.html>). The funders had no role in study design, data collection and analysis, decision to publish, or preparation of the manuscript.

**Competing Interests:** The authors have declared that no competing interests exist.

## Conclusion

Patient-reported outcome measures and objective biomechanical gait data can be an effective method of predicting individual treatment success to an exercise intervention. Measuring gait kinematics, along with patient-reported outcome measures in a clinical setting can be useful in helping make evidence-based decisions regarding optimal treatment for patients with knee OA.

## Introduction

Muscle strengthening exercises have become an integral part of the management of mild-to-moderate knee osteoarthritis (OA) [1]. Previous research studies have reported that patients with knee OA commonly demonstrate improvements in patient-reported pain and physical function following a muscle strengthening exercise intervention [1–5]. However, the effect sizes in many of these trials remain small, most likely the result of the large variability in the individual responses rather than a limitation of the intervention itself [6]. This variability in treatment success has led to a recent paradigm shift from a “one size fits all” model to a personalized medicine approach, with a focus on identifying responders or non-responders [6–8]. While some research has suggested patient-reported outcome measures (e.g., pain  $\geq$  6/10) may be effective in predicting responders to exercise in hip OA populations [9], this relationship remains unclear [10]. Therefore, further research is needed to validate patient-reported outcome measures and to identify additional variables that may help in the developmental phase of clinical prediction rules for a patient with knee OA’s response to exercise [11].

It is well accepted that patients with knee OA have altered gait, but much like the responses to exercise there is considerable heterogeneity across previous research investigations. While differences in sagittal and frontal plane kinematics have been observed between those with and without knee OA [12–18], as well as between OA severities [12,15–17], compartments [13,18], and bilateral vs. unilateral OA [14,19], a recent systematic review and meta-analysis demonstrated a lack of consistency across studies, suggesting patients with knee OA exhibit a wide variety of biomechanical changes in response to the disease [20]. Similarly, Sagawa Jr. et al. [21] reported that patients with knee OA can adopt a variety of unique gait profiles in the sagittal and frontal plane. Moreover, examining inter-subject variability in kinematic waveforms (e.g., principal component analysis; PCA) has been shown to be useful in discriminating [22] and subgrouping knee OA gait patterns [23]. Gaudreault et al. [23] reported that by grouping patients with similar gait patterns at baseline, significant changes in gait were evident post-intervention that could not have been observed otherwise. Therefore, differences in biomechanical gait profiles observed at the beginning of an exercise intervention may be important predictors of response to the intervention, and complement patient-reported outcome measures.

Hip muscle strengthening is one type of exercise intervention that has been shown to be effective in reducing the pain of patients with knee OA, but there remains no information on identifying individuals who respond best [24,25]. Bennell et al., [24] found significant improvements in pain and function overall following a hip strengthening exercise intervention, but they did not examine differences in subjects at baseline and acknowledged that such differences may have been informative of those patients that responded best. The authors suggested that future work should examine baseline gait parameters as a method to predict potential responders to a hip strengthening program. To the our knowledge, no study has yet to examine

whether patient-reported outcome measures and walking gait kinematic data for patients with knee OA are predictive of response to a hip strengthening exercise intervention.

Therefore, the primary purpose of this study was to use pre-intervention sagittal and frontal plane kinematics, in addition to patient-reported outcome measures, to predict post-intervention response to a 6-week hip strengthening exercise intervention in patients with mild-to-moderate knee OA. It was hypothesized that a unique combination of these parameters obtained at baseline would define a subspace that would successfully classify patients with knee OA as Non-Responders, Low-Responders, or High-Responders to the exercise intervention. The secondary purpose of the study was to examine the stability of the knee OA group centroids in the classification subspace following the 6-week intervention, as well as at a 3–4 year follow-up in a limited subset.

## Methods

### Ethics Statement

The experimental protocol was approved by the Conjoint Health Research Ethics Board at the University of Calgary and written informed consent was obtained from all participants prior to testing. The individual demonstrating the exercise protocol in [S1 File](#) has given written informed consent to publish these images.

### Subjects and Design

A total of 98 adults with knee OA (53 females and 45 males) who were  $\geq 40$  years of age and met the American College of Rheumatology clinical criteria for mild-to-moderate knee OA in at least one knee [26] were recruited from a database held at an orthopaedic knee clinic at the University of Calgary. Thirty-nine of the patients with knee OA completed a 6-week hip strengthening exercise intervention. The remaining 59 patients with knee OA were not enrolled in the exercise intervention and completed a single baseline testing to be used in the data reduction step to be described in the Data Analysis section ([Fig 1](#)). All participants were required to be able to walk without assistive devices and have no physical or medical condition for which the testing protocol would be contraindicated. Knee OA participants were excluded if they (1) were diagnosed with severe knee OA, (2) were currently undertaking physiotherapy or other conservative management practices, including corticosteroid injections, (3) had taken oral corticosteroids or anti-inflammatories in the 24 hours prior to testing, (4) had systemic arthritic conditions, or (5) had a body mass index (BMI)  $> 35 \text{ kg/m}^2$ . Forty-three pain-free controls (25 females, 18 males) were also recruited from the aforementioned database to be used as reference data to compare to the patients with knee OA ([Fig 1](#)). These pain-free controls were  $\geq 40$  years of age with no knee pain or prior history of knee injury/surgery and no known OA of any lower extremity joint or spine. Univariate comparisons of demographic information between knee OA patients and pain-free controls (independent t-tests), as well as between responder subgroups and pain-free controls (one-way analysis of variances) can be found in [Table 1](#).

### Procedure

All patients with knee OA ( $n = 98$ ) and pain-free controls ( $n = 43$ ) had three-dimensional lower limb kinematics collected at 120 Hz using an 8-camera Vicon MX3 (Vicon Motion Systems, Oxford, UK) motion capture system for 60 seconds while walking on an instrumented treadmill (Bertec, Columbus OH, USA). Participants walked at a self-selected normal speed chosen during a familiarization period prior to recording. A total of 27, 9 mm retro-reflective

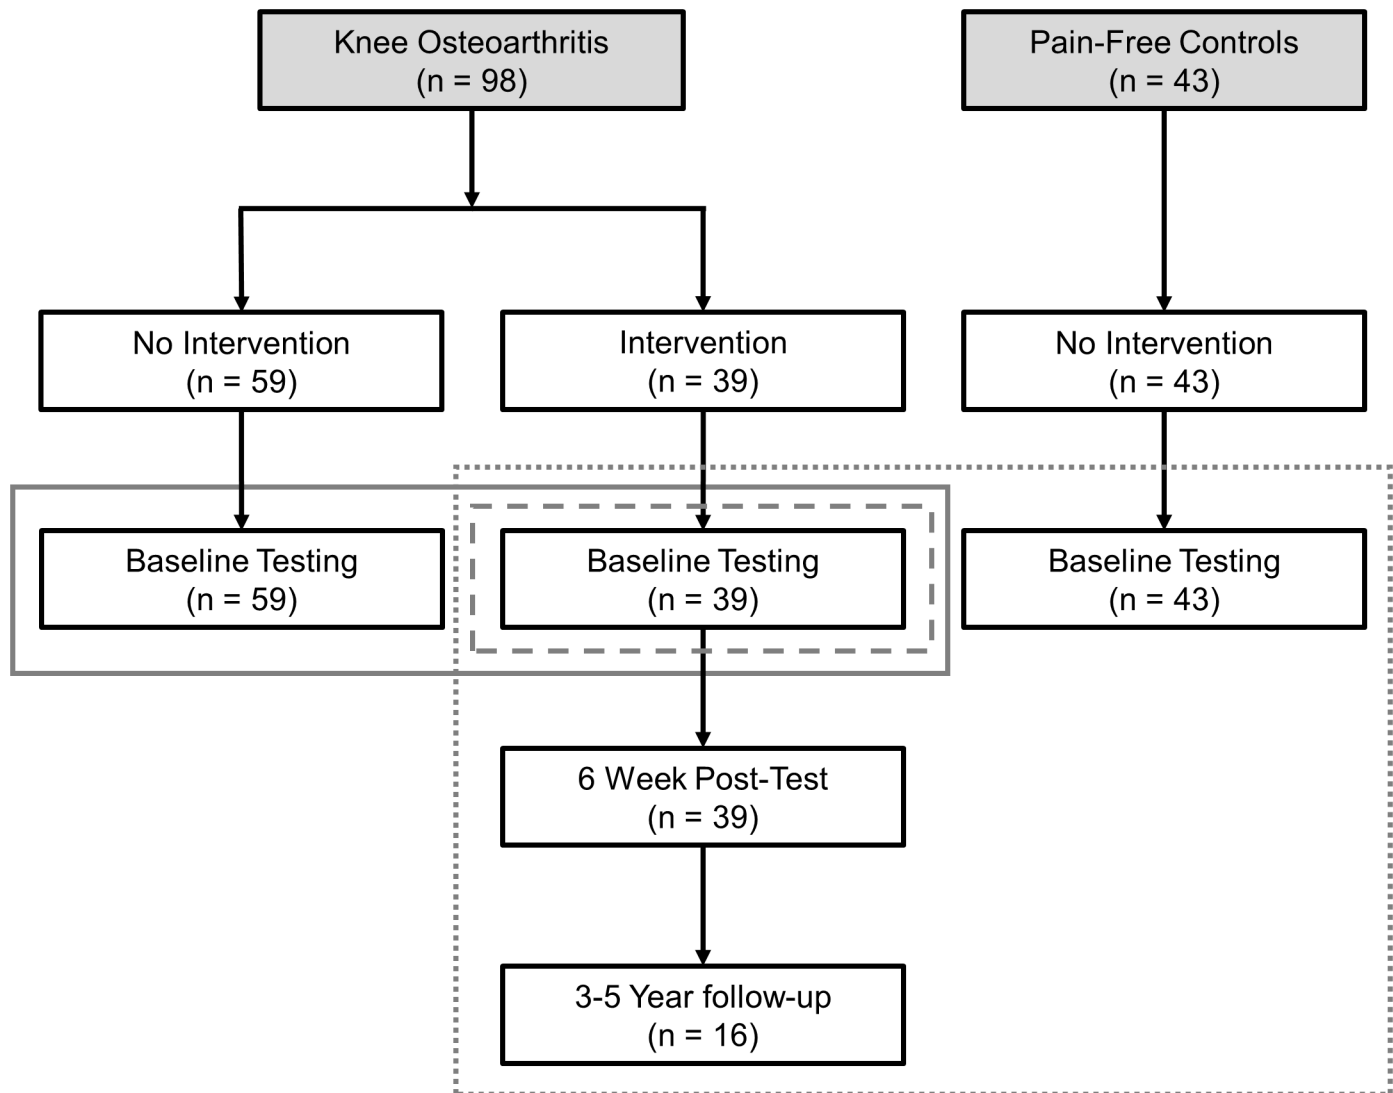

**Fig 1. Flowchart illustrating the testing of patients with knee OA and pain-free controls. The three outlining boxes depict use of participants for data reduction (solid), classification algorithm (dashed), and projection in classification subspace (dotted).**

doi:10.1371/journal.pone.0139923.g001

markers were attached to the pelvis, thighs, shanks, and feet, with an additional 18 markers also attached to anatomical landmarks for a neutral standing trial to identify joint centre locations [27,28]. Marker trajectories were filtered with a 10 Hz low-pass 2nd order recursive Butterworth filter and lower body joint angles were calculated using a rigid-body SVD approach [29], and a Joint Coordinate System [30].

In addition to gait kinematics, patients with knee OA enrolled in the exercise intervention (n = 39) also completed a Knee Injury and Osteoarthritis Outcome Score (KOOS). The KOOS is a 42-item self-administered knee-specific standardized questionnaire (5 Likert boxes) which has been shown to display adequate to high test-retest reliability in a knee OA population [31]. The questionnaire assesses five subscales consisting of pain, symptoms, function in daily living (ADL), sport and recreation function, and knee related quality of life (QoL), where a normalized score is calculated for each subscale (100 indicating no symptoms and 0 indicating extreme symptoms) [32]. In the current study, only four subscales were examined (pain,

**Table 1. Means (SD) of demographics for all patients with knee OA (n = 98) and pain-free controls (n = 43), as well as responder subgroups in the subset of patients with knee OA who were enrolled in the exercise intervention (n = 39).**

| Groups (n)           | Age (yrs) | Speed (m/s)  | BMI (kg/m <sup>2</sup> ) | Sex (% F) | OA Compartment (% of patients with Med-Lat-PF-Multi) |
|----------------------|-----------|--------------|--------------------------|-----------|------------------------------------------------------|
| Controls (43)        | 53 (10)   | 1.16 (0.04)  | 24.8 (3.7)               | 58%       |                                                      |
| OA (98)              | 56 (7)    | 1.13 (0.07)* | 26.9 (3.6)*              | 54%       |                                                      |
| Intervention OA (39) |           |              |                          |           |                                                      |
| Non-Responders (14)  | 58 (7)    | 1.16 (0.03)  | 25.5 (2.2)               | 57%       | 43–7–29–21                                           |
| Low-Responders (14)  | 53 (7)    | 1.15 (0.03)  | 24.5 (1.7)               | 57%       | 50–0–14–36                                           |
| High-Responders (11) | 57 (6)    | 1.12 (0.07)  | 27.5 (3.5)               | 100%      | 64–0–0–36                                            |

\*OA significantly different from Controls (p < 0.05).

Abbreviations: Med = Medial Compartment; Lat = Lateral Compartment; PF = Patellafemoral Compartment; Multi = Multicompartmental.

doi:10.1371/journal.pone.0139923.t001

symptoms, ADL, and QoL) as many of the sport and recreation function questions did not apply to the patients. The 39 patients with knee OA involved in the exercise protocol completed the KOOS prior-to and following the exercise intervention.

### Intervention

Following baseline testing, the 39 patients with knee OA in the intervention protocol began a 6-week therapist-directed hip strengthening exercise program. Participants completed dynamic resistance strengthening exercises for the hip using Thera-Band (The Hygenic Corporation, Akron OH, USA) elastic bands. The exercise protocol focused on the hip abductors, hip flexors, hip external rotators, gluteus medius, and core stability ([S1 File](#)). The individual in this manuscript has given written informed consent (as outlined in PLOS consent form) to publish these case details. The exercises were shown to the participants by a Board Certified Athletic Therapist who also oversaw one exercise session per week to monitor pain, compliance, and technique. Progression of exercises, including increases or decreases in sets and repetitions or duration of exercises, and changes in TheraBand (Hygenic Corp, Akron, OH) resistance were at the discretion of the Athletic Therapist, based on patient feedback and symptoms during rehabilitation progression. Participants were asked to perform the exercises daily and record the days they completed the exercises. The average number of days per week the exercises were completed was 5.5 (±1.5). The strengthening program was based on a protocol that has been shown to be effective for improving symptoms in patients suffering from patellofemoral pain syndrome [33]. Similar hip strengthening programs have also been shown to improve pain and function in patients diagnosed with knee OA [24,25].

### Subgrouping

Patients with knee OA in the intervention were subgrouped based on their change in patient-reported KOOS subscale scores (pain, symptoms, ADL, and QoL) at the end of the 6-week exercise intervention, as compared to baseline scores [34]. The effect size (Cohen’s d) of the intervention for each participant was averaged across all four KOOS subscales to label participants as Non-Responders (effect size < 0.2), Low-Responders (0.2 ≤ effect size < 0.8), or High-Responders (effect size ≥ 0.8) [35]. This method of subgrouping was applied instead of the OMERACT/OARSI criteria [36] to allow for three potential response groups, as opposed to the binary responder criterion. All but one of the High-Responders met the OMERACT/

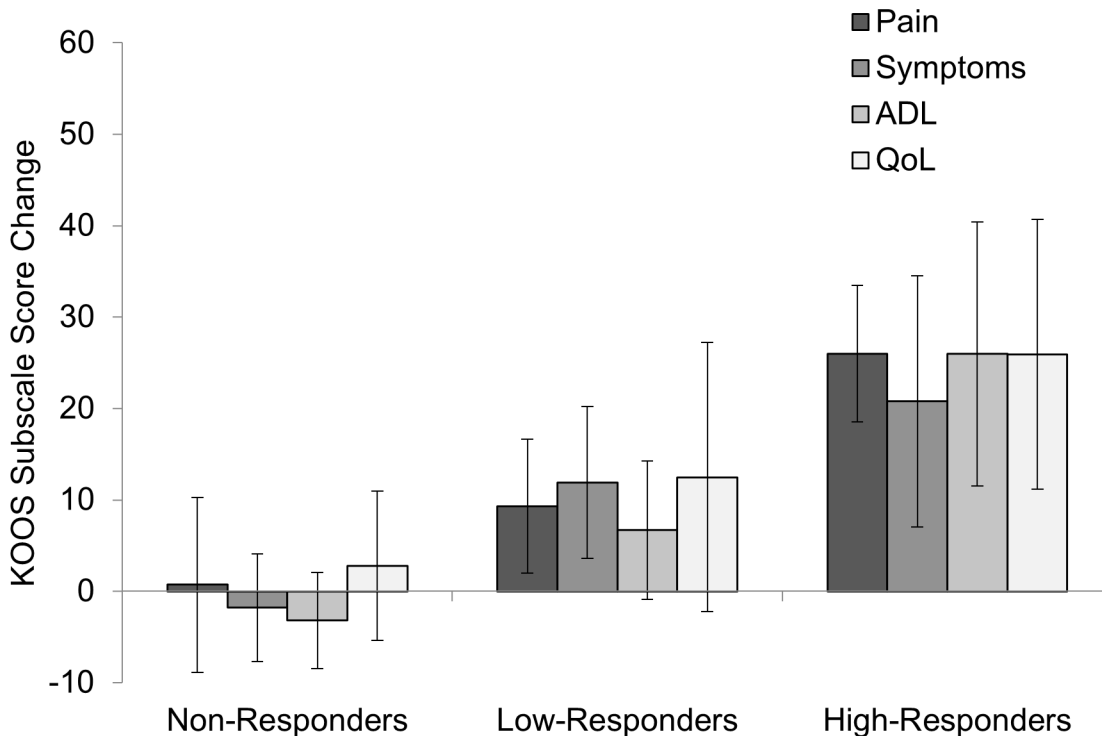

**Fig 2. Absolute change in KOOS subscale scores following 6-week intervention, organized by subgroups.** Abbreviations: ADL = Function in Daily Living; QoL = Knee Related Quality of Life. Note: KOOS is measured on a scale of 100, with 100 being best (e.g., no pain) and 0 being worst (e.g., most pain imaginable).

doi:10.1371/journal.pone.0139923.g002

OARSI criteria to be defined as responders, while no Low- or Non-Responders met these criteria. The absolute change in KOOS subscales following the 6-week exercise intervention for each responder subgroup are shown in Fig 2.

### Data Analysis

All data processing was performed using MATLAB 8.4 (The MathWorks Inc., Natick, MA) with statistical analyses performed in IBM SPSS Statistics 21 (SPSS Inc., Armonk NY, USA). The primary purpose of the study, to classify knee OA subgroups as Non-Responders, Low-Responders, or High-Responders using pre-intervention patient-reported outcome measures and gait, was completed in three steps; (1) data reduction, (2) feature selection, and (3) classification as shown in Fig 3.

First, given the large amount of gait data, a principal component analysis (PCA) was used as a data reduction technique [37,38]. A PCA summarizes the variability among participants for a given dataset by creating a new set of orthogonal variables which not only describe, but are ordered based on the variance each explains in the original dataset [37,39]. While studies have successfully used such data reduction techniques with limited sample sizes [40,41], a minimum of 50–100 subjects has been recommended even for highly correlated data [42,43]. Therefore, to limit the risk of overfitting and make the data reduction more generalizable, the gait kinematics of the 59 patients with knee OA who were not involved in the exercise intervention, were included in the PCA.

Prior to conducting the PCA, sagittal and frontal plane hip, knee, and ankle joint angle waveforms from the most affected leg were normalized to stance (60%) and swing (40%)

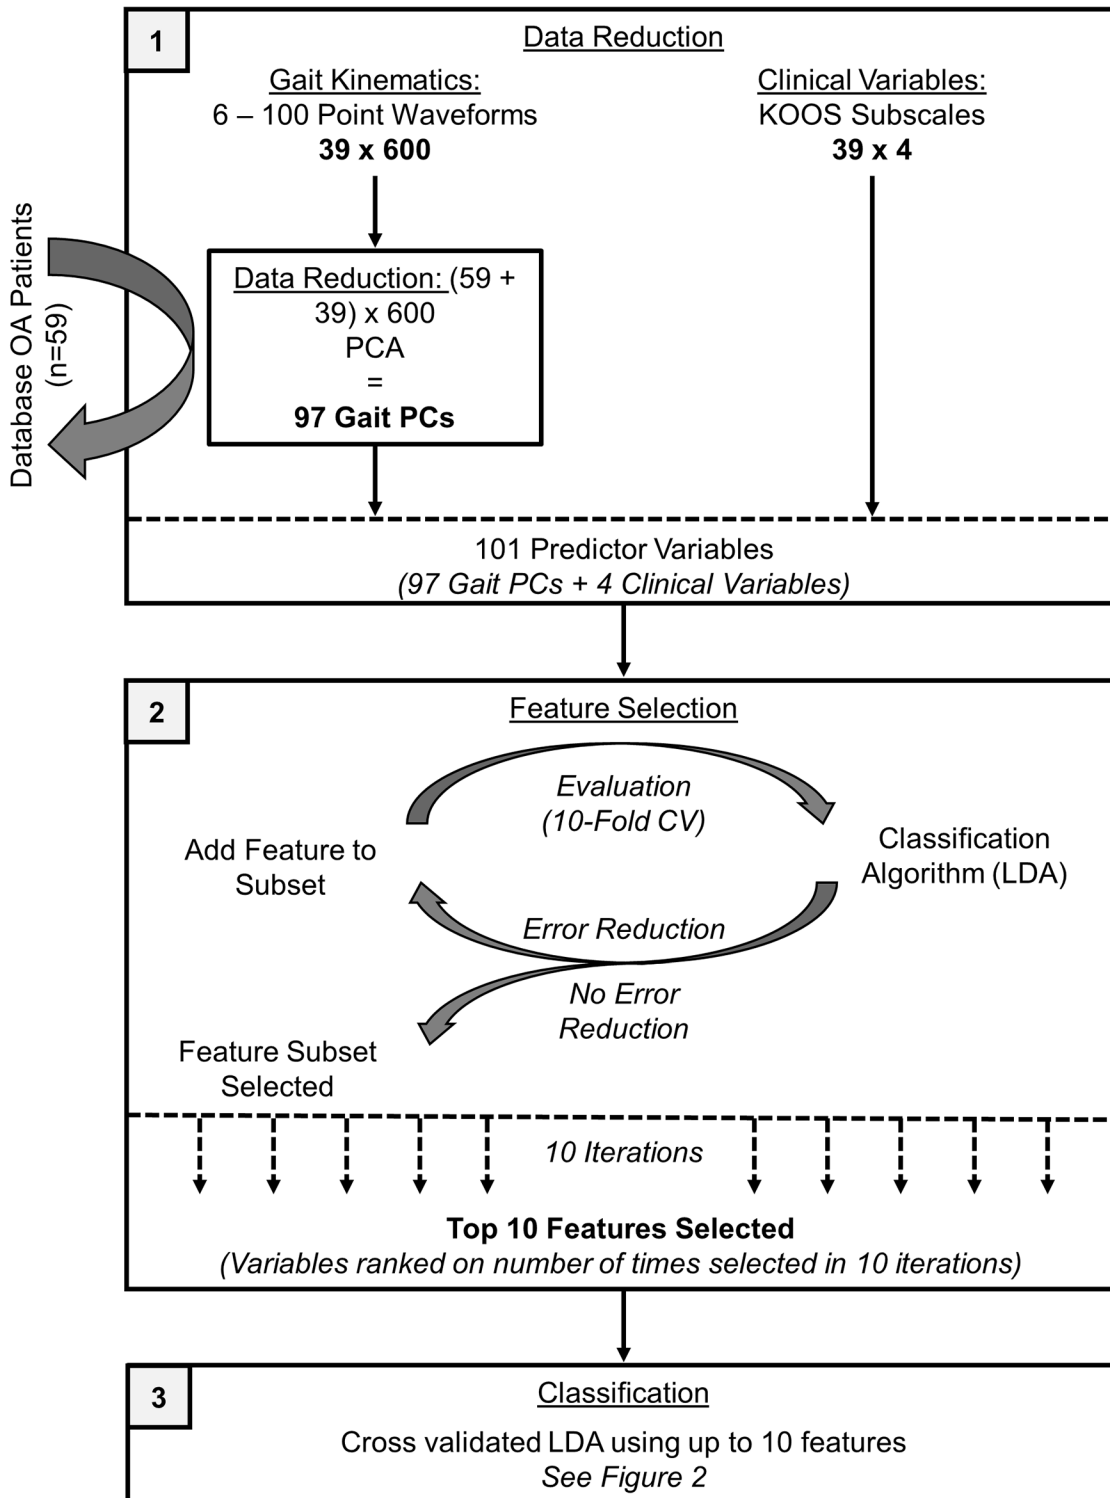

**Fig 3. Three primary steps involved in data analysis for the classification of responder subgroups; data reduction, feature selection, and classification.**

doi:10.1371/journal.pone.0139923.g003

phases and averaged across 10 consecutive strides. The six kinematic waveforms were then combined into a 98 x 600 matrix (patients with knee OA x waveform data points). The matrix was standardized to a mean of 0 and a standard deviation of 1 [44], and a PCA was performed resulting in 97 principal components (PCs). Therefore, the 600 point gait kinematic waveform of each individual at the baseline of the exercise intervention was reduced to 97 PC scores that related to the direction of the largest total variance in knee OA gait and indicated how the individual deviated from the average. These gait PCs were then combined with the four KOOS subscales to create 101 potential predictor variables.

Second, feature selection was accomplished by selecting a subset of predictor variables using a sequential forward feature selection. This technique utilized the same classification algorithm to be used in the final step of data analysis (linear discriminant analysis; LDA), but begins with no predictor variables in the feature subset and sequentially adds a variable that produced the greatest error reduction until adding any additional variable does not reduce this error [45]. The measure of error used in the current study was a 10-fold cross-validation error which was repeated 10 times (i.e., 10x10-fold cross-validation [46]). The use of a cross-validated error measure is critical when selecting features to minimize the statistical bias or overfitting of the final model [47]. All selected features were ordered by percentage of times selected in the 10 iterations and only the top 10 features were selected to meet the minimum requirements of the classification model (i.e., one less than the smallest subgroup size) [48].

Finally, the 10 features selected were used in a classification algorithm to determine the cross-validated classification accuracy of the best subset of features. Specifically, a LDA was used to classify knee OA participants as Non-Responders, Low-Responders, or High-Responders with up to 10 of the selected features. The goal of the LDA was to linearly combine multiple independent variables into k-1 composite variables, called discriminant functions (where k equals the number of responder groups), that best discriminate group membership [49]. All features were normally distributed (Kolmogorov-Smirnov and Lilliefors correction test) with no outliers, both critical assumptions of the LDA [48]. Cumulatively entering features into the LDA, in the order of percentage of times selected in the feature selection step, and selecting the combination with the greatest 10x10 fold classification accuracy determined the best classification model. The significance of the discriminant functions was defined using Wilks' Lambda ( $p < 0.05$ ) and equivalence of variance-co-variance matrices was tested using Box's M statistic ( $p > 0.05$ ).

The secondary purpose, to examine the stability of the knee OA group centroids, was completed by projecting post-intervention and 3-4 year follow-up data into the best classification model's subspace. The 39 patients with knee OA enrolled in the exercise intervention were not followed or tracked in any way after their 6-week post-test until being contacted for a onetime testing session (i.e., gait kinematics and KOOS questionnaire) an average of 3.5 ( $\pm 0.3$ ) years following their involvement in the study. The subset of follow-up patients that was recruited ( $n = 16$ ) displayed similar BMI and gait speed compared to their baseline testing (Table 2).

**Table 2. Means (SD) of demographics for 3-4 follow-up patients (n = 16) at baseline at 3.5 ( $\pm 0.3$ ) years following their involvement in the study.**

| Responder Subgroups (n) |           | Age (yrs) | Speed (m/s) | BMI (kg/m <sup>2</sup> ) | Sex (% F) |
|-------------------------|-----------|-----------|-------------|--------------------------|-----------|
| Non-Responders (7)      | Baseline  | 58 (7)    | 1.15 (0.01) | 25.7 (2.3)               | 43%       |
|                         | Follow-up | 62 (6)    | 1.13 (0.02) | 26.0 (3.2)               | 43%       |
| Low-Responders (7)      | Baseline  | 52 (8)    | 1.14 (0.03) | 24.4 (1.9)               | 57%       |
|                         | Follow-up | 56 (8)    | 1.14 (0.03) | 23.9 (1.7)               | 57%       |
| High-Responders (2)     | Baseline  | 61 (6)    | 1.15 (0.01) | 30.6 (5.1)               | 100%      |
|                         | Follow-up | 65 (5)    | 1.15 (0.02) | 29.0 (6.3)               | 100%      |

doi:10.1371/journal.pone.0139923.t002



Pain-free controls were also projected into the classification subspace to increase the clinical interpretation of the model. Before these data could be projecting into the subspace, kinematic data were organized and processed in a manner identical to pre-intervention knee OA data and PC scores were computed from the coefficients of the PCs used in the best classifying LDA. These PC scores depicted how the new kinematic data (i.e., post-intervention, 3–4 year follow-up, pain-free controls) deviated from the average baseline kinematic data (i.e., 98 patients with knee OA) used in conducting the PCA. In addition to gait data, the necessary patient-reported outcome measures (KOOS subscales) were used to compute discriminant functions scores and plot these results in the classification subspace. Since control participants were pain-free, they were assigned perfect scores on the KOOS subscales. Although it is unlikely that all control subjects would reach perfect scores on all KOOS subscales [50], the primary use of this data was as a pain-free control reference for comparing to responder subgroups in the classification subspace.

## Results

On average, all patients with knee OA walked slower ( $t(139) = -2.641, p = 0.009$ ) and had a greater BMI ( $t(139) = 3.066, p = 0.002$ ) than pain-free controls, but no individual responder subgroups differed in age ( $F(3,78) = 1.563, p = 0.205$ ), gait speed ( $F(3,78) = 2.314, p = 0.082$ ), BMI ( $F(3,78) = 2.364, p = 0.078$ ), and sex ( $F(3,78) = 2.555, p = 0.061$ ; [Table 1](#)). The best classifying LDA revealed two significant discriminant functions ( $\Lambda = 0.095, \chi^2(14, N = 39) = 77.5, p < 0.001$ ), which used 1 patient-reported outcome measure and 6 gait PCs to explain 74.6% of the variation between subgroups and achieve a 10x10 fold cross-validation classification accuracy of 85.4%. Box's M statistic indicated that the assumption of equivalence of variance-covariance matrices was not violated ( $p = 0.39$ ). Discriminant function scores were used to plot patients with knee OA in the LDA classification subspace shown in [Fig 4](#).

The first discriminant function was primarily related to the KOOS ADL subscale and gait PC 51 ([Table 3](#)) and was most important for discriminating High-Responders from other subgroups, as High-Responders displayed the highest scores on discriminant function 1 ([Fig 4](#)). Based on the relationship between these variables and discriminant function 1 shown in [Table 3](#), higher discriminant function 1 scores were related to lower (i.e., worse) ADL scores ([Fig 5](#)) and higher gait PC 51 scores. Gait PC 51 was associated with the pattern of motion in hip frontal plane kinematics during loading response. High-Responders scored higher on gait PC 51 ( $p = 0.001$ ) than other subgroups, which related to High-Responders being more likely to display an increasing pattern of hip adduction during loading response, while other subgroups were more likely to maintain or decrease hip adduction during this time.

The second discriminant function related to the combination of gait PCs 46, 86, and 90 ([Table 3](#)) and was most important for discriminating Non-Responders from Low-Responders, as Low-Responders displayed higher scores on discriminant function 2 than Non-Responders ([Fig 4](#)). Gait PC 46 was generally related to a relationship between hip and ankle kinematics at toe-off. Non-Responders scored higher on gait PC 46 ( $p = 0.003$ ) than Low-Responders suggesting they are more likely to have reduced plantarflexion, in relation to hip extension, at toe-off. The remaining higher-order gait PCs were more difficult to interpret but were primarily loaded on hip and knee kinematics during loading response (gait PC 86) and frontal plane ankle kinematics during stance (gait PC 90). [Fig 6](#) visually illustrates where these gait PCs are most highly loaded on the kinematic waveforms.

Pain-free control data were projected into the classification subspace in [Fig 7](#). The control group's centroid was most similar to the Low-Responders, followed by Non-Responders, and lastly High-Responders. Projecting post-intervention knee OA subgroups into the classification

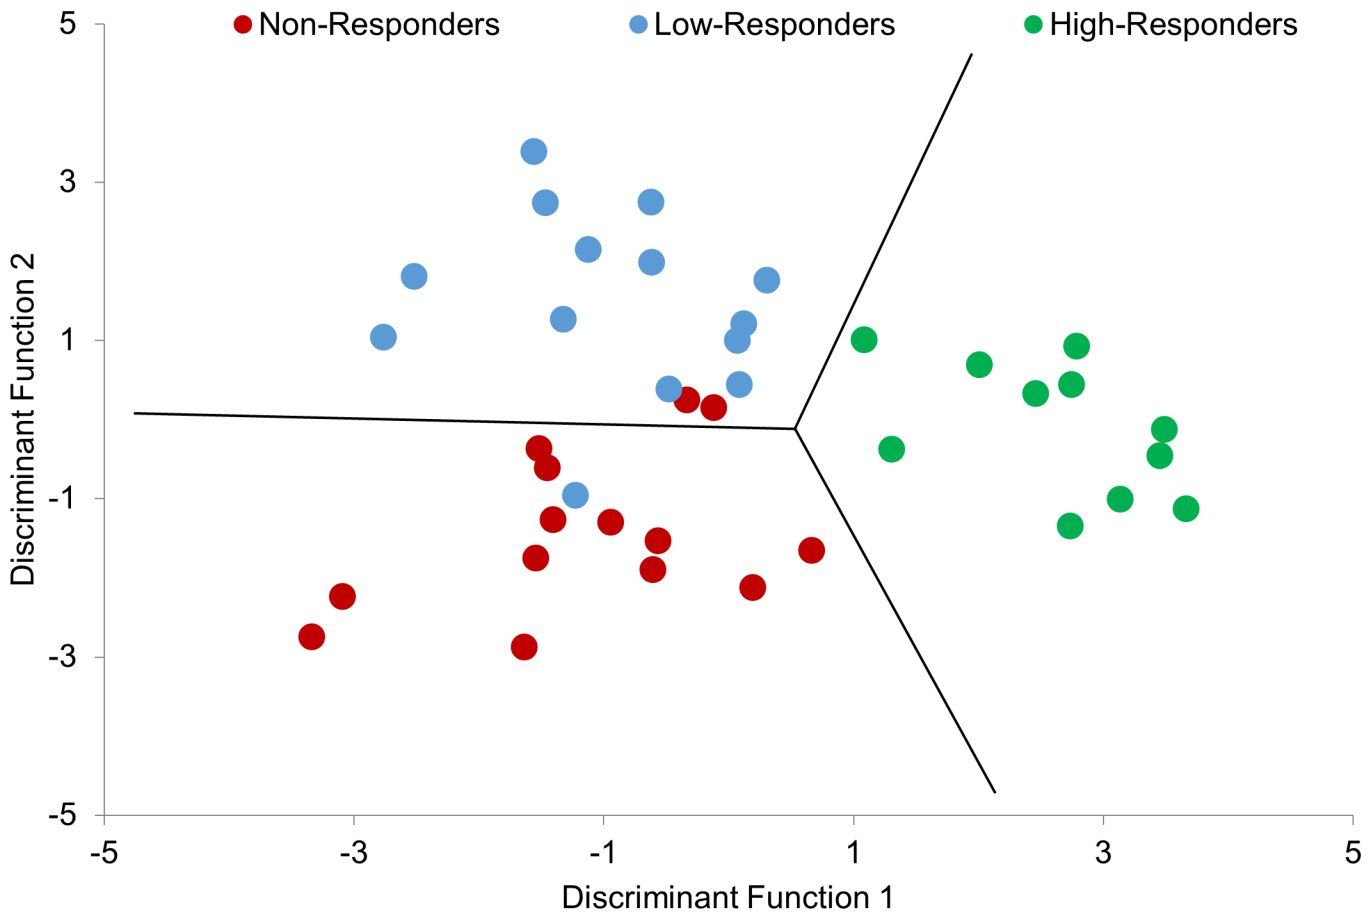

**Fig 4. Scatterplot of discriminant function scores computed from pre-intervention patient-reported outcome measure (ADL) and gait of knee OA responder subgroups.**

doi:10.1371/journal.pone.0139923.g004

subspace demonstrated that although subgroup centroids shifted, they all remained in their initial third of the subspace. Similarly, projecting the subset of patients with knee OA that completed the 3–4 year follow-up (n = 16), revealed all subgroup centroids remained in their initial third of the subspace even after an average of 3.5 (± 0.3) years.

**Table 3. Structure matrix of correlations between predictor variables and discriminant functions.**

| Principal Components | Discriminant Function 1 | Discriminant Function 2 |
|----------------------|-------------------------|-------------------------|
| ADL                  | -0.42 <sup>a</sup>      | 0.01                    |
| PC51                 | 0.34 <sup>a</sup>       | 0.06                    |
| PC11                 | 0.28                    | 0.15                    |
| PC22                 | 0.25                    | 0.07                    |
| PC46                 | 0.00                    | -0.47 <sup>a</sup>      |
| PC90                 | 0.03                    | 0.40 <sup>a</sup>       |
| PC86                 | 0.06                    | 0.30 <sup>a</sup>       |

Abbreviations: ADL = Function in daily living subscale; PC = Gait Principal Component.

<sup>a</sup> Correlation ≥ 0.3 signifies most important variables on each discriminant function.

doi:10.1371/journal.pone.0139923.t003

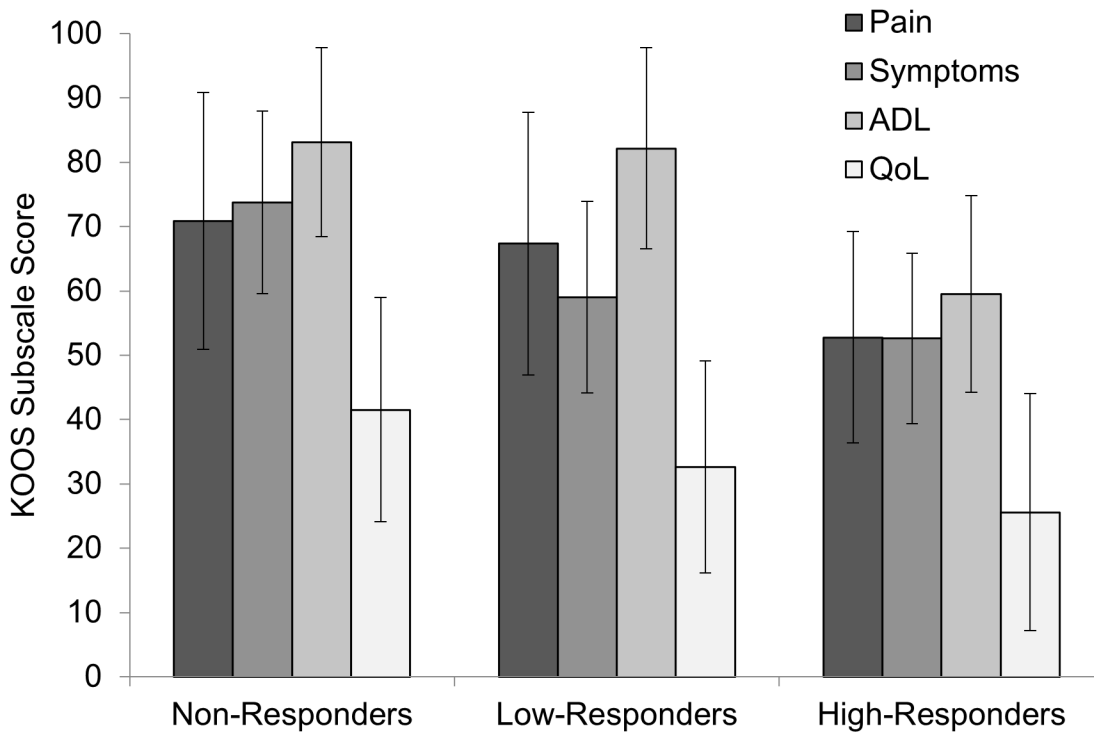

**Fig 5. Pre-intervention Knee Injury and Osteoarthritis Outcome Score subscales of pain, symptoms, function in daily living (ADL), and knee related quality of life (QoL) of Non-Responders, Low-Responders, and High-Responders. Note: KOOS is measured on a scale of 100, with 100 best (e.g., no pain) and 0 being worst (e.g., most pain imaginable).**

doi:10.1371/journal.pone.0139923.g005

## Discussion

The purpose of this study was to use pre-intervention kinematic gait data and patient-reported outcome measures to classify patients with mild-to-moderate knee OA as Non-Responders, Low-Responders, and High-Responders to a 6-week hip strengthening exercise protocol. In support of our hypothesis, by using a combination of these patient-reported outcome measures and biomechanical parameters we were able to successfully classify (85.4% cross-validated accuracy) responder subgroups. To our knowledge, this is the first study to use patient-reported outcome measures and objective biomechanical gait waveform data to successfully predict individual treatment success to an exercise intervention in knee OA.

In order to create a more efficient and effective model of care for knee OA, it is critical to provide the right patients the right treatment at the right time. Using baseline patient data to classify responders can assist clinicians in directing patients to the most effective treatment, potentially saving time and concomitantly reducing health care costs. The model developed in the current study shows that the use of patient-reported outcome measures and gait data was able to successfully predict responders to a 6-week exercise intervention with greater than 85% accuracy. While we are not aware of previous research studies combining patient-reported outcome measures and gait data, Weigl et al. [51] reported 74.8% classification accuracy for hip and knee OA responders using predictor variables such as sex, depression symptoms, and medical history. Similarly, a study on patients with hip OA by Wright et al. [9] used predictor variables such as age, pain, duration of symptoms, and gait speed to achieve 65% classification accuracy for determining responders. Thus, the results of the current study suggest that patient-reported outcome measures, combined with objective gait data within a relatively

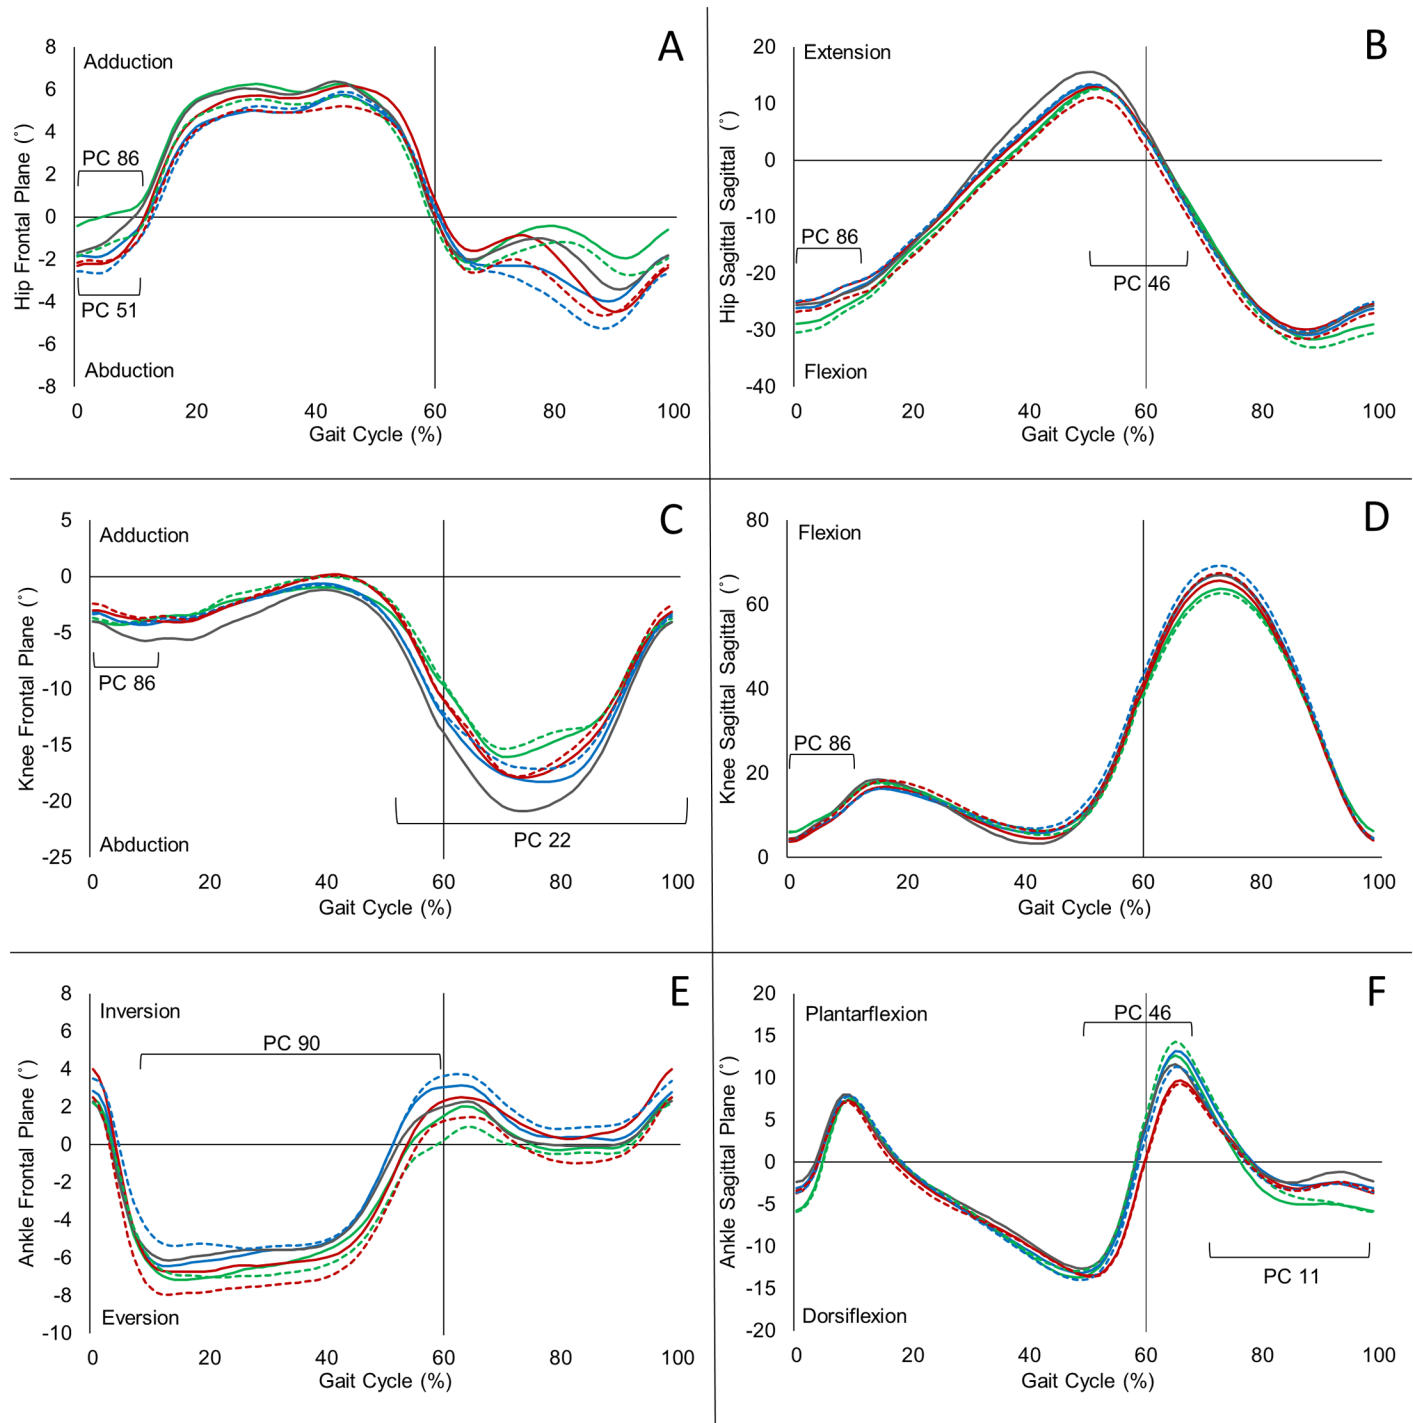

**Fig 6. Frontal and sagittal kinematic waveforms for the hip, knee, and ankle of High-Responders (green), Low-Responders (blue), Non-Responders (red), and controls (grey) both pre (solid) and post-intervention (dashed), with peak loadings of predictor principal components illustrated with brackets.**

doi:10.1371/journal.pone.0139923.g006

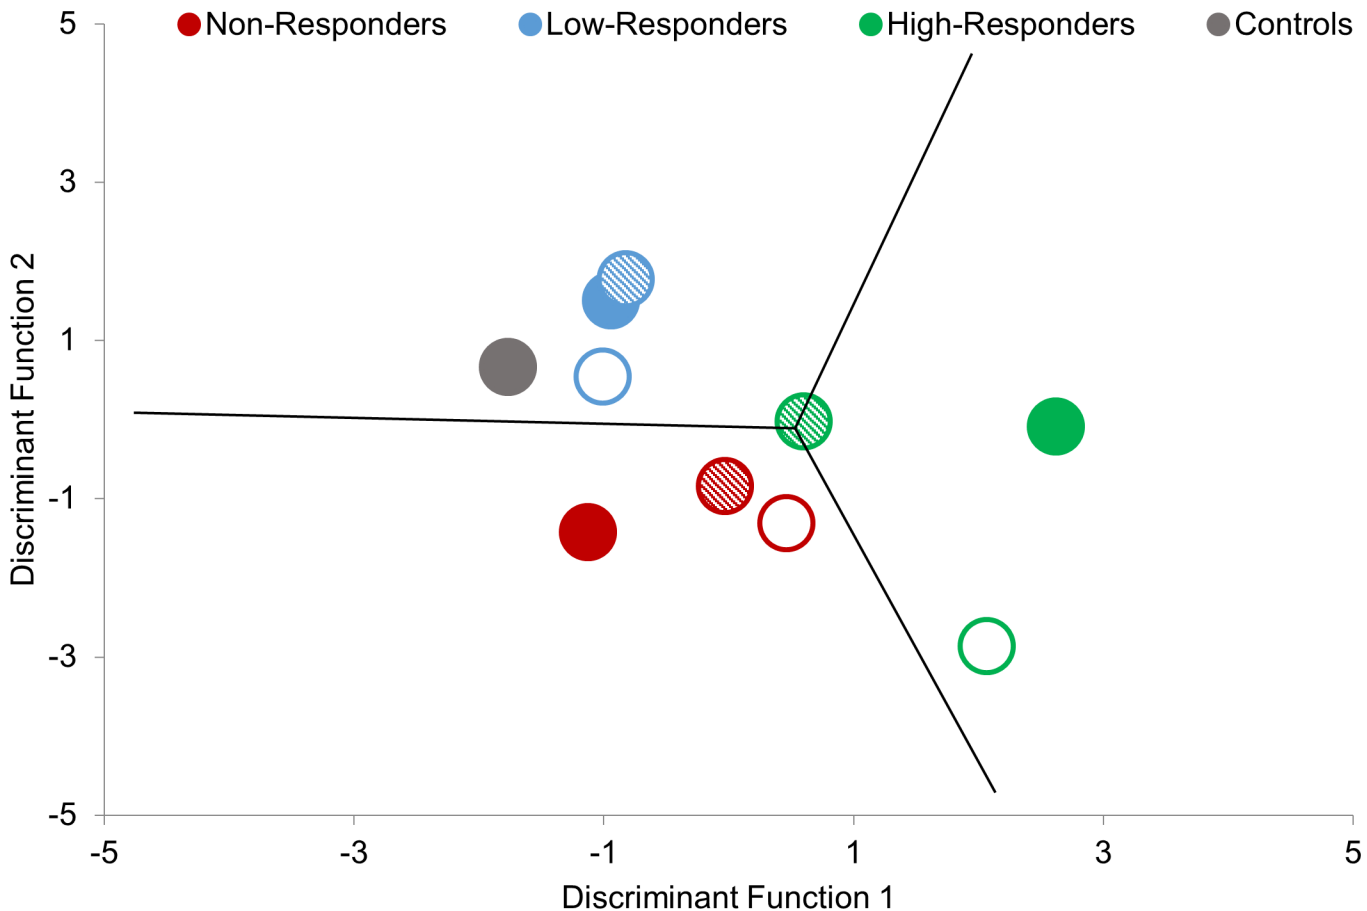

**Fig 7. Scatterplot of group centroids for pre-intervention (solid), post-intervention (striped), and 3–4 year recall (open) of knee OA subgroups.**

doi:10.1371/journal.pone.0139923.g007

heterogeneous knee OA population, may provide a robust method for identifying subgroups of responders and non-responders. Moreover, the current study improves upon the aforementioned investigations [9,51], in that the model provides a three-group solution, rather than two, and the cross-validated classification accuracy uses partitioned subsets of subjects to predict the left-out subset of subjects, thereby limiting overfitting of the model. Nevertheless, this remains a preliminary study depicting cross-validated error and requires test-set validation using a new cohort of patients with knee OA to determine the true predictive accuracy that one may expect in a clinical setting.

Perhaps equally as important as statistical validation of the model is a clinical interpretation of the model. The first discriminant function was able to accurately discriminate High-Responders from Low-Responders and Non-Responders, and it did so primarily using two clinically interpretable predictor variables. First, individuals who responded best to the treatment intervention reported lower ADL scores at baseline. This finding is similar to that of Wright et al. [9] who also found patient-reported outcome measures (e.g.,  $\geq 6/10$  pain) could be used as a predictor of treatment success in hip OA patients. Additionally, High-Responders displayed different hip frontal plane kinematics during loading response (gait PC 51) of walking gait as compared to other subgroups. Fig 6(A) illustrates that High-Responders underwent an increasing level of hip adduction during the loading response, while Low-Responders and Non-Responders were better able to maintain their frontal plane hip angle throughout this

phase of gait. This finding is supported by previous investigations that have reported that control of the hip in the frontal plane plays a key role in the loading of the knee joint [52]. It can be postulated that those individuals with impaired control at the hip, secondary to reduced muscle strength, are more likely to respond favourably to an exercise intervention focused on hip muscle strengthening. The current findings therefore suggest that lower patient-reported ADL and hip frontal plane kinematics may be the most effective measures to determine a subset of individuals who will respond best to a hip strengthening exercise intervention.

In discriminating Non-Responders from Low-Responders, the second discriminant function utilized interactions between hip, knee, and ankle kinematics, but the most important gait PCs were associated with ankle kinematics. Gait PC 46 was a measure of the relationship between hip and ankle kinematics at toe-off, which showed Non-Responders exhibited less plantarflexion during toe-off than Low-Responders. Reduced plantarflexion at toe-off in older adults has been associated with a shift in power generation from distal joints (e.g., ankle) to more proximal joints (e.g., hip) [53], potentially due to reduced muscle function at the extremities. Therefore, the atypical gait mechanics exhibited by the Non-Responders suggests that this group may benefit from a more personalized rehabilitation program or one focused more on restoring atypical distal joint biomechanics, as opposed to the hip-protocol employed in the current study.

The second most important variable, gait PC 90, in the second discriminant function was primarily loaded on ankle frontal plane kinematics during stance. While interpreting higher-order PCs such as this can be difficult, they have been suggested to represent subtle patterns of movement that can contain valuable information for comparing between individuals [54]. Munderman et al. [52] also found gait compensations at both the hip and ankle joint in the frontal plane of patients with knee OA, but concluded changes in gait were more likely related to the hip rather than the ankle. The current findings support the importance of ankle biomechanics, particularly for Non-Responders, but similar to the conclusions of other authors [24,25], we suggest that there may be multiple patient subgroups who display different compensation strategies and react differently to treatments. Again, it further begs the question, would the Non-Responders from this hip strengthening exercise intervention become High-Responders to an ankle strength and balance exercise intervention? While the answer to that question remains outside the scope of this study, it identifies the need to conduct further research with different exercise interventions and treatment avenues to better understand how we can find the right treatment for the right patient.

Patient-reported outcome measures and gait data post-intervention and at the 3–4 year follow-up projected into the classification subspace showed that the model remained relatively stable over time. While High-Responders moved towards controls in the classification subspace following the intervention, their group centroid remained in the right third of the classification subspace (Fig 7). Therefore, this finding not only demonstrates the stability of the model, but also suggests that most of these patients would benefit from continuing with this exercise intervention. Alternatively, Non-Responders moved further from controls yet remained in their initial third of the classification space, providing evidence that this intervention is most likely still inappropriate for this subgroup. Finally, the stability of the model was also supported in the subset of patients with knee OA who completed the 3–4 year follow-up. Again, while group centroids shifted, each subgroup remained in their initial third of the subspace. Nevertheless, these results must be interpreted with caution considering that changes in treatment, activity, or severity were not measured for this subset of 3–4 year follow-up data and therefore any movement in the classification subspace are difficult to clinically interpret.

Given the findings of the current study and the growing literature demonstrating the impact of gait in OA [12–20], it is becoming increasingly apparent that evaluating patterns of movement

should be a key concern for clinicians as part of their patient assessment. Unfortunately, many clinicians do not have access to 3D gait analysis systems, such as the VICON system utilized in the current study. With this in mind, there have been many simple, low cost and often portable motion analysis techniques developed and validated in the literature that can make gait analysis possible in a clinical setting [55,56]. Additionally, with the advent of wearable technology there are even more options available to a clinician when it comes to evaluating a patient's gait [57,58]. Nevertheless, these clinically assessable technologies require a certain amount technical expertise and produce large amounts of data that can be difficult for clinicians to interpret. Therefore, developing methods and prediction models that can help package this information in a clinically interpretable manner is paramount for the integration of gait analysis in clinical practice. Although further validation is required, the current study and specifically Fig 4, is one such example that can quickly and easily provide a clinician information on the likelihood of a patient responding based on their baseline data projecting a position on a 2D plot. Therefore, it is our hope that the findings presented in this study can be a first step towards developing tools that can use gait analysis to inform decision-making in the clinical setting.

Although the current study can provide many new insights into predicting the response of patients with knee OA to an exercise intervention, it remains a preliminary investigation with known limitations. First, since the current study remains in the developmental phase of clinical prediction rules examining a single intervention, the identified predictors may be prognostic factors that are not specific to this treatment. In other words, although the predictors were clinically interpretable as being associated with a hip strengthening program, given the current design we cannot rule out that these factors may simply relate to High-Responders in general and as such these individuals would respond well to other treatment types (e.g., quadriceps strengthening, patient education). Second, there are a relatively low number of subjects involved in the 6-week investigation and as such, there is risk of the model overfitting the data. However, the use of an additional 59 patients with knee OA for data reduction and given the high redundancy in data such as kinematic waveforms [59] combined with the normal distribution and lack of outliers in the predictor variables, we are confident this risk was minimized [47]. Most importantly, the use of a cross-validation technique to select predictors and determine classification error was utilized in the present study to further minimize any overfitting errors. Nevertheless, it should be noted that with any classification model, regardless of the number of subjects, additional testing on a new test set of subjects is required to determine its true predictive capability. Third, individual Kellgren-Lawrence grading was not provided for patients with knee OA, thereby preventing an objective comparison of severity between responder subgroups. The individual scoring of radiographs was not done for this analysis since all subjects had a confirmed diagnosis of mild-to-moderate knee OA [26] and there is limited evidence for the sensitivity of radiographic grading in such a population [60,61]. Finally, both males and females were included in the same classification model. Although sex differences may exist in the gait biomechanics of patients with knee OA [62,63], no gait PCs used in the classification model were significantly correlated with sex. Therefore any differences in gait biomechanics that may have existed due to sex had a minimal effect on the classification subspace.

## Conclusion

These findings of the current study are the first to support the use of pre-intervention patient-reported outcome measures and biomechanical parameters for predicting response to an exercise intervention in a knee OA population. The best classification model of High-Responders, Low-Responders, and Non-Responders to a 6-week hip strengthening exercise intervention

included a combination of baseline patient-reported ADL and biomechanical gait data. Lower patient-reported ADL and hip frontal plane kinematics were most important in classifying High-Responders from other sub-groups, while a combination of hip, knee, and ankle kinematics were used to classify Non-Responders from Low-Responders. Although these predictors identified responders to a 6-week hip strengthening program, their relationship with other types of interventions remains unclear and further validation is required. Nevertheless, this research remains a significant first step in developing an objective system to help clinicians make evidence-based decisions regarding optimal treatment for patients with knee OA.

## Supporting Information

**S1 File. Hip strengthening exercise protocol and daily training log given to patients for weeks 1 to 6 of intervention.**  
(PDF)

## Acknowledgments

The authors would like to thank our research coordinator Jill Baxter and the Alberta Osteoarthritis Team for their support, as well as all participants who so generously gave their time to be involved in this study.

## Author Contributions

Conceived and designed the experiments: DK SO BH RF. Performed the experiments: DK SO BH RF. Analyzed the data: DK SO BH RF. Contributed reagents/materials/analysis tools: DK SO BH RF. Wrote the paper: DK SO BH RF.

## References

1. Fransen M, McConnell S, Harmer A, Van Der Esch M, Simic M, Bennell KL. Exercise for osteoarthritis of the knee (Review). *Cochrane Database of Systematic Review*. 2015; 1:CD004376.
2. Abbott JH, Robertson MC, Chapple C, Pinto D, Wright AA, Leon de la Barra S, et al. Manual therapy, exercise therapy, or both, in addition to usual care, for osteoarthritis of the hip or knee: A randomized controlled trial. *Osteoarthritis and Cartilage*. 2013; 21(4): 525–534. PMID: [23313532](#)
3. Jansen MJ, Viechtbauer W, Lenssen AF, Hendriks EJM, de Bie RA. Strength training alone, exercise therapy alone, and exercise therapy with passive manual mobilisation each reduce pain and disability in people with knee osteoarthritis: A systematic review. *Journal of Physiotherapy*. 2011; 57(1): 11–20. doi: [10.1016/S1836-9553\(11\)70002-9](#) PMID: [21402325](#)
4. Jamtvedt G, Dahm KT, Christie A, Moe RH, Haavardsholm E, Holm I, et al. Physical therapy interventions for patients with osteoarthritis of the knee: An overview of systematic reviews. *Physical Therapy*. 2008; 88(1): 123–136. PMID: [17986496](#)
5. Lin C-WC, Taylor D, Bierma-Zeinstra SMA, Maher CG. Exercise for osteoarthritis of the knee. *Physical Therapy*. 2010; 90(6): 839–842. doi: [10.2522/ptj.20100084](#) PMID: [20515871](#)
6. Buford TW, Pahor M. Making preventive medicine more personalized: Implications for exercise-related research. *Preventive Medicine*. 2012; 55(1): 34–36. doi: [10.1016/j.ypmed.2012.05.001](#) PMID: [22588227](#)
7. Karsdal MA, Christiansen C, Ladel C, Henriksen K, Kraus VB, Bay-Jensen AC. Osteoarthritis—A case for personalized health care? *Osteoarthritis and Cartilage*. 2014; 22(1): 7–16. doi: [10.1016/j.joca.2013.10.018](#) PMID: [24216058](#)
8. McAlindon TE, Bannuru RR. OARSI recommendations for the management of hip and knee osteoarthritis: The semantics of differences and changes. *Osteoarthritis and Cartilage*. 2010; 18(4): 473–475. doi: [10.1016/j.joca.2010.02.011](#) PMID: [20171299](#)
9. Wright AA, Cook CE, Flynn TW, Baxter GD, Abbott JH. Predictors of response to physical therapy intervention in patients with primary hip osteoarthritis. *Physical Therapy*. 2011; 91(4): 510–524. doi: [10.2522/ptj.20100171](#) PMID: [21310898](#)



10. French H, Galvin R. Predictors of short-term outcome to exercise and manual therapy for people with hip osteoarthritis. *Physical Therapy*. 2014; 94(1): 31–39. doi: [10.2522/ptj.20130173](https://doi.org/10.2522/ptj.20130173) PMID: [23929827](https://pubmed.ncbi.nlm.nih.gov/23929827/)
11. Adams ST, Leveson SH. Clinical prediction rules. *BMJ*, 2012; 344.
12. Astephen JL, Deluzio KJ, Caldwell GE, Dunbar MJ. Biomechanical changes at the hip, knee, and ankle joints during gait are associated with knee osteoarthritis severity. *Journal of Orthopedic Research*. 2008; 26(3): 332–341.
13. Butler RJ, Barrios JA, Royer T, Davis IS. Frontal-plane gait mechanics in people with medial knee osteoarthritis are different from those in people with lateral knee osteoarthritis. *Physical Therapy*. 2011; 91(8): 1235–1243. doi: [10.2522/ptj.20100324](https://doi.org/10.2522/ptj.20100324) PMID: [21680772](https://pubmed.ncbi.nlm.nih.gov/21680772/)
14. Creaby MW, Bennell KL, Hunt MA. Gait differs between unilateral and bilateral knee osteoarthritis. *Archives of Physical Medicine and Rehabilitation*. 2012; 93(5): 822–827. PMID: [22385873](https://pubmed.ncbi.nlm.nih.gov/22385873/)
15. Favre J, Erhart-Hledik JC, Andriacchi TP. Age-related differences in sagittal-plane knee function at heel-strike of walking are increased in osteoarthritic patients. *Osteoarthritis and Cartilage*. 2014; 22(3): 464–471. doi: [10.1016/j.joca.2013.12.014](https://doi.org/10.1016/j.joca.2013.12.014) PMID: [24445065](https://pubmed.ncbi.nlm.nih.gov/24445065/)
16. Huang SC, Wei IP, Chien HL, Wang TM, Liu YH, Chen HL, et al. Effects of severity of degeneration on gait patterns in patients with medial knee osteoarthritis. *Medical Engineering & Physics*. 2008; 30(8): 997–1003.
17. Hunt MA, Wrigley TV, Hinman RS, Bennell KL. Individuals with severe knee osteoarthritis (OA) exhibit altered proximal walking mechanics compared with individuals with less severe OA and those without knee pain. *Arthritis Care & Research*. 2010; 62(10): 1426–1432.
18. Weidow J, Tranberg R. Hip and knee joint rotations differ between patients with medial and lateral knee osteoarthritis: Gait analysis of 30 patients and 15 controls. *Journal of Orthopaedic Research*. 2006; 24(9): 1890–1899. PMID: [16838360](https://pubmed.ncbi.nlm.nih.gov/16838360/)
19. Mills K, Hettinga BA, Pohl MB, Ferber R. Between-limb kinematic asymmetry during gait in unilateral and bilateral mild-to-moderate knee osteoarthritis. *Archives of Physical Medicine & Rehabilitation*. 2013; 94(11): 2241–2247.
20. Mills K, Hunt MA, Ferber R. Biomechanical deviations during level walking associated with knee osteoarthritis: A systematic review and meta-analysis. *Arthritis Care and Research*. 2013; 65(10): 1643–1665. doi: [10.1002/acr.22015](https://doi.org/10.1002/acr.22015) PMID: [23554153](https://pubmed.ncbi.nlm.nih.gov/23554153/)
21. Sagawa Y, Armand S, Lubbeke A, Hoffmeyer P, Fritschy D, Suva D, et al. Associations between gait and clinical parameters in patients with severe knee osteoarthritis: A multiple correspondence analysis. *Clinical Biomechanics*. 2013; 28(3): 299–305. doi: [10.1016/j.clinbiomech.2013.01.008](https://doi.org/10.1016/j.clinbiomech.2013.01.008) PMID: [23410553](https://pubmed.ncbi.nlm.nih.gov/23410553/)
22. Deluzio KJ, Astephen JL. Biomechanical features of gait waveform data associated with knee osteoarthritis: an application of principal component analysis. *Gait & Posture*. 2007; 25(1): 86–93.
23. Gaudreault N, Mezghani N, Turcot K, Hagemeister N, Boivin K, de Guise JA. Effects of physiotherapy treatment on knee osteoarthritis gait data using principal component analysis. *Clinical Biomechanics*. 2011; 26(3): 284–291. doi: [10.1016/j.clinbiomech.2010.10.004](https://doi.org/10.1016/j.clinbiomech.2010.10.004) PMID: [21071119](https://pubmed.ncbi.nlm.nih.gov/21071119/)
24. Bennell KL, Hunt MA, Wrigley TV, Hunter DJ, McManus FJ, Hodges PW, et al. Hip strengthening reduces symptoms but not knee load in people with medial knee osteoarthritis and varus malalignment: A randomised controlled trial. *Osteoarthritis and Cartilage*. 2010; 18(5): 621–628. doi: [10.1016/j.joca.2010.01.010](https://doi.org/10.1016/j.joca.2010.01.010) PMID: [20175973](https://pubmed.ncbi.nlm.nih.gov/20175973/)
25. Sled EA, Khoja L, Deluzio KJ, Olney SJ, Culham EG. Effect of a home program of hip abductor exercises on knee joint loading, strength, function, and pain in people with knee osteoarthritis: A clinical trial. *Physical Therapy*. 2010; 90(6): 895–904. doi: [10.2522/ptj.20090294](https://doi.org/10.2522/ptj.20090294) PMID: [20378679](https://pubmed.ncbi.nlm.nih.gov/20378679/)
26. Altman R, Asch E, Bloch D, Bole G, Borenstein D, Brandt K, et al. Development of criteria for the classification and reporting of osteoarthritis. Classification of osteoarthritis of the knee. Diagnostic and Therapeutic Criteria Committee of the American Rheumatism Association. *Arthritis and Rheumatism*. 1986; 29(8): 1039–1049. PMID: [3741515](https://pubmed.ncbi.nlm.nih.gov/3741515/)
27. Pohl MB, Patel C, Wiley P, Ferber R. Hip biomechanics and muscular strength in patients with patellofemoral osteoarthritis. *Gait & Posture*. 2013; 37(3): 440–444.
28. Pohl MB, Lloyd C, Ferber R. Can the reliability of three-dimensional running kinematics be improved using functional joint methodology? *Gait & Posture*. 2010; 32(4): 559–563.
29. Söderqvist I, Wedin P-A. Determining the movement of the skeleton using well-configured markers. *Journal of Biomechanics*. 1993; 26(12): 1473–1477. PMID: [8308052](https://pubmed.ncbi.nlm.nih.gov/8308052/)
30. Cole GK, Nigg BM, Ronsky JL, Yeadon MR. Application of the joint coordinate system to three-dimensional joint attitude and movement representation: A standardization proposal. *Journal of Biomechanical Engineering*. 1993; 115(4A): 344–349. PMID: [8309227](https://pubmed.ncbi.nlm.nih.gov/8309227/)

31. Collins NJ, Misra D, Felson DT, Crossley KM, Roos EM. Measures of knee function: International Knee Documentation Committee (IKDC) Subjective Knee Evaluation Form, Knee Injury and Osteoarthritis Outcome Score (KOOS), Knee Injury and Osteoarthritis Outcome Score Physical Function Short Form (KOOS-PS), Knee Outcome Survey Activities of Daily Living Scale (KOS-ADL), Lysholm Knee Scoring Scale, Oxford Knee Score (OKS), Western Ontario and McMaster. *Arthritis Care Res.* 2011; 63: 208–228.
32. Roos EM, Roos HP, Lohmander LS, Ekdahl C, Beynonn BD. Knee Injury and Osteoarthritis Outcome Score (KOOS)—development of a self-administered outcome measure. *Journal of Orthopaedic & Sports Physical Therapy*; 1998; 28(2):88–96.
33. Ferber R, Bolgla LA, Earl-Boehm JE, Emery CA, Hamstra-Wright KL. Hip and core versus knee-muscle strengthening for the treatment of patellofemoral pain: A multicentre randomized controlled trial. *Journal of Athletic Training.* 2014; 50(4): 366–377.
34. Roos EM, Toksvig-Larsen S. Knee injury and Osteoarthritis Outcome Score (KOOS)—validation and comparison to the WOMAC in total knee replacement. *Health and Quality of Life Outcomes.* 2003; 1:17. PMID: [12801417](#)
35. Cohen J. *Statistical power analyses for the behavioural sciences*, Second Edition. New Jersey, Erlbaum 1988.
36. Pham T, van der Heijde D, Altman RD, Anderson JJ, Bellamy N, Hochberg M, et al. OMERACT-OARSI initiative: Osteoarthritis Research Society International set of responder criteria for osteoarthritis clinical trials revisited. *Osteoarthritis and Cartilage* 2004; 12(5): 389–399. PMID: [15094138](#)
37. Jombart T, Devillard S, Balloux F. Discriminant analysis of principal components: a new method for the analysis of genetically structured populations. *BMC Genetics.* 2010; 11:94. doi: [10.1186/1471-2156-11-94](#) PMID: [20950446](#)
38. Kobsar D, Osis ST, Hettinga BA, Ferber R. Classification accuracy of a single tri-axial accelerometer for training background and experience. *Journal of Biomechanics.* 2014; 47(10): 2508–2511. doi: [10.1016/j.jbiomech.2014.04.017](#) PMID: [24837221](#)
39. Jolliffe IT. *Principal component analysis*, Second Edition. New York, Springer-Verlag, 2002.
40. Reid SM, Graham RB, Costigan PA. Differentiation of young and older adult stair climbing gait using principal component analysis. *Gait & Posture.* 2010; 31(2), 197–203.
41. Federolf PA, Boyer KA, Andriacchi TP. Application of principal component analysis in clinical gait research: Identification of systematic differences between healthy and medial knee-osteoarthritic gait. *Journal of Biomechanics.* 2013; 46(13), 2173–2178. doi: [10.1016/j.jbiomech.2013.06.032](#) PMID: [23910389](#)
42. Mundfrom DJ, Shaw DG, Ke TL. Minimum Sample Size Recommendations for Conducting Factor Analyses. *International Journal of Testing*, 2005; 5(2), 159–168.
43. Comrey A, Lee H. 1992. *A first course in factor analysis*. NJ: Hillsdale: Erlbaum.
44. Kettaneh N, Berglund A, Wold S. PCA and PLS with very large data sets. *Computational Statistics and Data Analysis.* 2005; 48(1): 69–85.
45. Kumari B, Swarnkar T. Filter versus Wrapper Feature Subset Selection in Large Dimensionality Micro array: A review, 2011; 2(3), 1048–1053.
46. Borra S, Di Ciaccio A. Measuring the prediction error. A comparison of cross-validation, bootstrap and covariance penalty methods. *Computational Statistics & Data Analysis.* 2010; 54(12), 2976–2989.
47. Barbash S, Soreq H. Statistically invalid classification of high throughput gene expression data. *Nature: Scientific Reports.* 2013; 3, 1–4.
48. Tabachnick BG, Fidell LS. *Using Multivariate Statistics*, Fifth Edition. New York, Harper Collins College Publishers 1996.
49. Quinn QP, Keough MJ. *Experimental Design and Data Analysis for Biologists*. Cambridge, Cambridge University Press 2002.
50. Paradowski PT, Bergman S, Sundén-Lundius A, Lohmander LS, Roos EM. Knee complaints vary with age and gender in the adult population. Population-based reference data for the Knee injury and Osteoarthritis Outcome Score (KOOS). *BMC Musculoskelet. Disord.* 2006; 7: 38. PMID: [16670005](#)
51. Weigl M, Angst F, Aeschlimann A, Lehmann S, Stucki G. Predictors for response to rehabilitation in patients with hip or knee osteoarthritis: A comparison of logistic regression models with three different definitions of responder. *Osteoarthritis and Cartilage.* 2006; 14(7): 641–651. PMID: [16513373](#)
52. Mündermann A, Dyrby CO, Andriacchi TP. Secondary gait changes in patients with medial compartment knee osteoarthritis: increased load at the ankle, knee, and hip during walking. *Arthritis and Rheumatism*, 2005; 52(9), 2835–2844. PMID: [16145666](#)

53. Melzer I, Krasovsky T, Oddsson LI, Liebermann DG. Age-related differences in lower-limb force-time relation during the push-off in rapid voluntary stepping. *Clinical Biomechanics*. 2010; 25: 989–994. doi: [10.1016/j.clinbiomech.2010.07.009](https://doi.org/10.1016/j.clinbiomech.2010.07.009) PMID: [20724044](https://pubmed.ncbi.nlm.nih.gov/20724044/)
54. Phinyomark A, Osis ST, Hettinga BA, Ferber R. Do intermediate- and higher-order principal components contain useful information to detect subtle changes in lower extremity biomechanics during running? *Human Movement Science*. (in press).
55. Carse B, Meadows B, Bowers R, Rowe P. Affordable clinical gait analysis: An assessment of the marker tracking accuracy of a new low-cost optical 3D motion analysis system. *Physiotherapy* 2013; 99: 347–51. doi: [10.1016/j.physio.2013.03.001](https://doi.org/10.1016/j.physio.2013.03.001) PMID: [23747027](https://pubmed.ncbi.nlm.nih.gov/23747027/)
56. Jordan K, Dziedzic K, Mullis R, Dawes PT, Jones PW. The development of three-dimensional range of motion measurement systems for clinical practice. *Rheumatol* 2001; 40: 1081–4.
57. Tao W, Liu T, Zheng R, Feng H. Gait analysis using wearable sensors. *Sensors (Basel)* 2012; 12: 2255–83.
58. Kobsar D, Olson C, Paranjape R, Hadjistavropoulos T, Barden JM. Evaluation of age-related differences in the stride-to-stride fluctuations, regularity and symmetry of gait using a waist-mounted tri-axial accelerometer. *Gait Posture*. 2014; 39: 553–557. doi: [10.1016/j.gaitpost.2013.09.008](https://doi.org/10.1016/j.gaitpost.2013.09.008) PMID: [24139685](https://pubmed.ncbi.nlm.nih.gov/24139685/)
59. Troje NF. Decomposing biological motion: A framework for analysis and synthesis of human gait patterns. *Journal of Vision*. 2002; 2(5), 371–387. PMID: [12678652](https://pubmed.ncbi.nlm.nih.gov/12678652/)
60. Amin S, LaValley MP, Guermazi A, Grigoryan M, Hunter DJ, Clancy M, et al. The relationship between cartilage loss on magnetic resonance imaging and radiographic progression in men and women with knee osteoarthritis. *Arthritis and Rheumatism*. 2005; 52(10): 3152–3159. PMID: [16200595](https://pubmed.ncbi.nlm.nih.gov/16200595/)
61. Guermazi A, Roemer FW, Burstein D, Hayashi D. Why radiography should no longer be considered a surrogate outcome measure for longitudinal assessment of cartilage in knee osteoarthritis. *Arthritis Research & Therapy*. 2011; 13(6): 247.
62. Chumanov ES, Wall-Scheffler C, Heiderscheidt BC. Gender differences in walking and running on level and inclined surfaces. *Clinical Biomechanics*. 2008; 23(10), 1260–1268. doi: [10.1016/j.clinbiomech.2008.07.011](https://doi.org/10.1016/j.clinbiomech.2008.07.011) PMID: [18774631](https://pubmed.ncbi.nlm.nih.gov/18774631/)
63. Barrios JA, Strotman DE. A sex comparison of ambulatory mechanics relevant to osteoarthritis in individuals with and without asymptomatic varus knee alignment. *Journal of Applied Biomechanics*, 2014; 30(5): 632–636. doi: [10.1123/jab.2014-0039](https://doi.org/10.1123/jab.2014-0039) PMID: [25010253](https://pubmed.ncbi.nlm.nih.gov/25010253/)
